# Supplementary material for: Reduction of hexavalent chromium by compost-derived dissolved organic matter
Source: Royal Society of Chemistry journal article supplement (doi:10.1039/d4em00280f), 2024-01-01
Supplement: d4em00280f1.pdf [file d4em00280f1.pdf]

# Supplementary Material

## Reduction of hexavalent chromium by compost-derived dissolved organic matter

Chuanghe Miao <sup>a</sup>, Hui Rong <sup>a</sup>, Xiaoqing Wei <sup>a</sup>, Jianying Shang <sup>a,b</sup>, Hu Zhou <sup>a,b\*</sup>, Yizhong Lv <sup>a,b\*</sup>

<sup>a</sup> College of Land Science and Technology, China Agricultural University, Beijing 100193, P. R. China

<sup>b</sup> Key Laboratory of Arable Land Conservation (North China), MARA, Beijing 100193, P. R. China

### 6 Figures and 3 Tables

**Fig. S1** FTIR spectra of DOM<sub>C</sub> fractions (HA<sub>C</sub> and FA<sub>C</sub>) and soil humic matter fractions (HA<sub>B</sub>, HA<sub>R</sub>, FA<sub>B</sub>, and FA<sub>R</sub>)

**Fig. S2** UV-Vis absorbance spectra of (a) HA<sub>C</sub>, (b) HA<sub>B</sub>, (c) HA<sub>R</sub>, (d) FA<sub>C</sub>, (e) FA<sub>B</sub>, and (f) FA<sub>R</sub> upon the addition of Cr(VI).

**Fig. S3** Differential log-transformed UV-Vis absorbance spectra of (a) HA<sub>C</sub>, (b) HA<sub>B</sub>, (c) HA<sub>R</sub>, (d) FA<sub>C</sub>, (e) FA<sub>B</sub>, and (f) FA<sub>R</sub> upon the addition of Cr(VI).

**Fig. S4** Synchronous maps of (a) HA<sub>C</sub>, (b) HA<sub>B</sub>, (c) HA<sub>R</sub>, (d) FA<sub>C</sub>, (e) FA<sub>B</sub>, and (f) FA<sub>R</sub> upon the addition of Cr(VI). The  $x_1$  or  $x_2$  axis represents the wavelength of the UV-Vis absorbance spectra.

**Fig. S5** Asynchronous maps for (a) HA<sub>C</sub>, (b) HA<sub>B</sub>, (c) HA<sub>R</sub>, (d) FA<sub>C</sub>, (e) FA<sub>B</sub>, and (f) FA<sub>R</sub> upon the addition of Cr(VI). The  $x_1$  or  $x_2$  axis represents the wavelength of the UV-Vis absorbance spectra.

**Fig. S6** Synchronous 2D-SFS-COS maps of the six organic matter fractions (a, HA<sub>C</sub>; b, HA<sub>B</sub>; c, HA<sub>R</sub>; d, FA<sub>C</sub>; e, FA<sub>B</sub>; f, FA<sub>R</sub>). The  $x_1$  or  $x_2$  was the excitation wavelength (nm) of the SFS.

**Fig. S7** Asynchronous 2D-SFS-COS maps of the six organic matter fractions (a, HA<sub>C</sub>; b, HA<sub>B</sub>; c, HA<sub>R</sub>; d, FA<sub>C</sub>; e, FA<sub>B</sub>; f, FA<sub>R</sub>). The  $x_1$  or  $x_2$  was the excitation wavelength (nm) of the SFS.

**Table S1** The content of HA and FA in the six organic matter fractions

**Table S2** The relative abundance of the integration of the three synchronous fluorescence regions of the six organic matter fractions

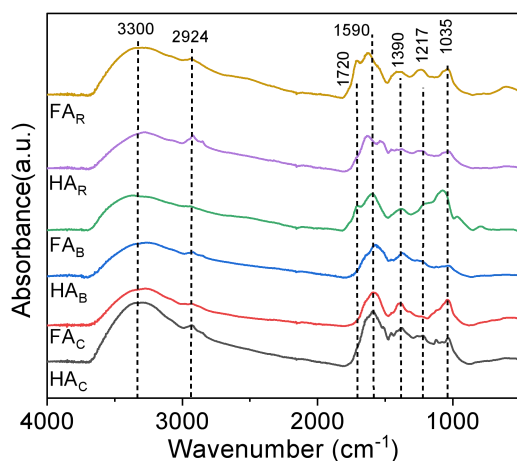

27  
 28 **Fig. S1** FTIR spectra of DOM<sub>C</sub> fractions (HAc and FAc) and soil humic matter fractions (HAB, HAR, FAB,  
 29 and FAR)

30

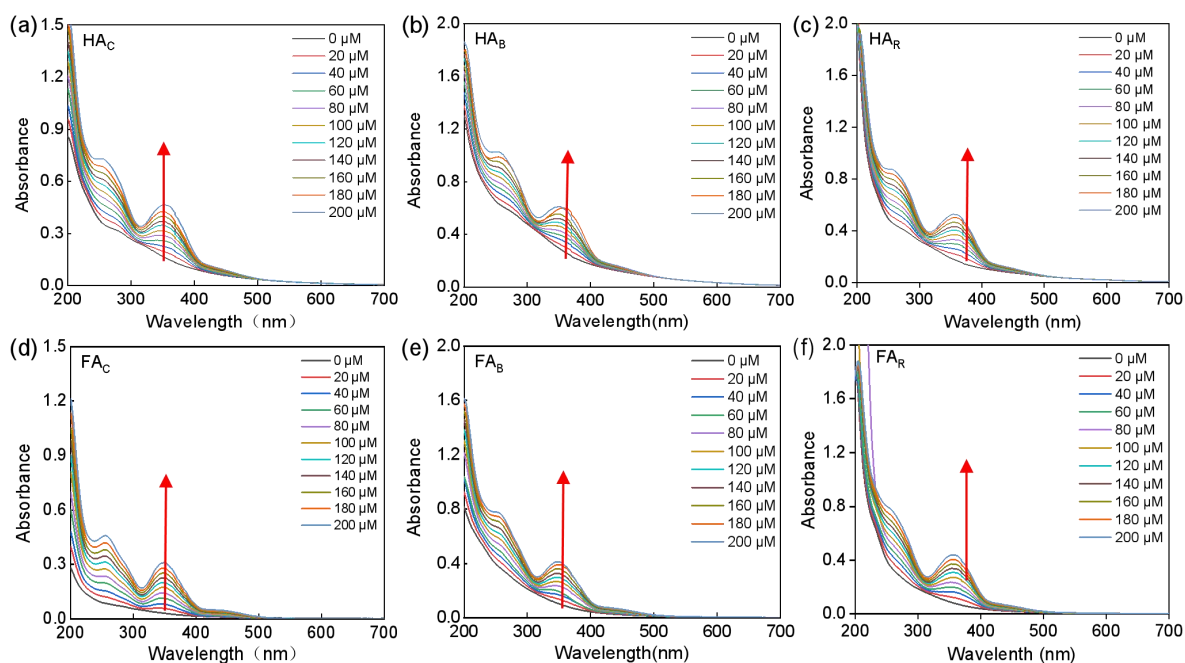

31  
 32 **Fig. S2** UV-Vis absorbance spectra of (a) HAc, (b) HAB, (c) HAR, (d) FAc, (e) FAB, and (f) FAR upon the  
 33 addition of Cr(VI).

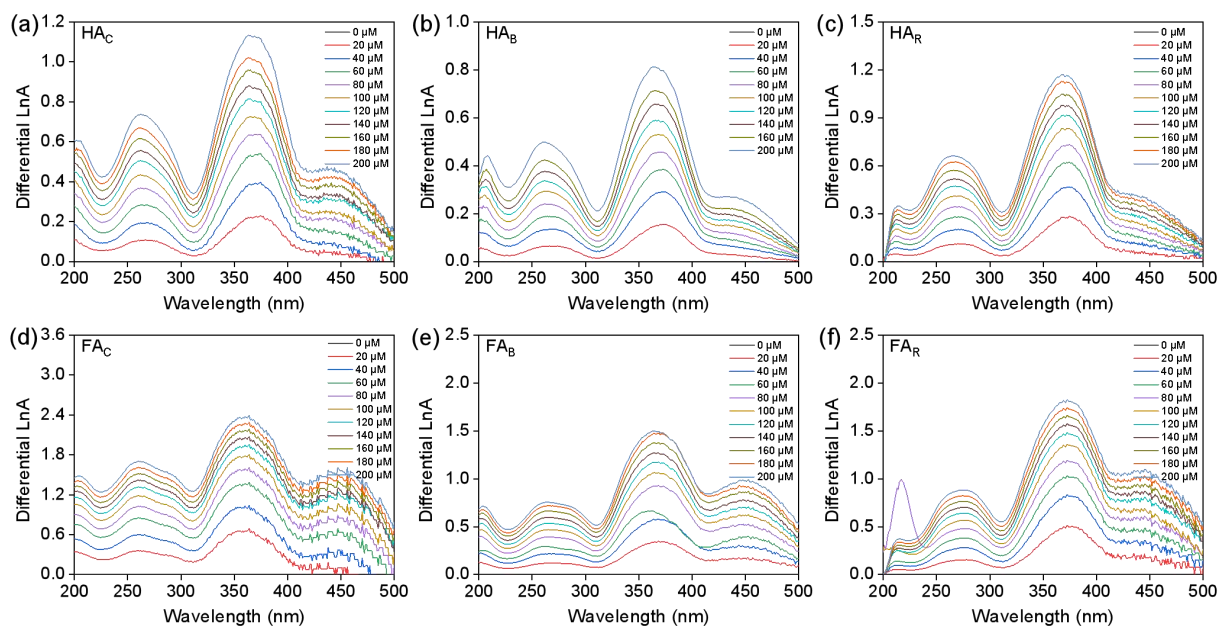

34  
 35 **Fig. S3** Differential log-transformed UV-Vis absorbance spectra of (a) HA<sub>C</sub>, (b) HA<sub>B</sub>, (c) HA<sub>R</sub>, (d) FA<sub>C</sub>, (e) FA<sub>B</sub>,  
 36 and (f) FA<sub>R</sub> upon the addition of Cr(VI).

37

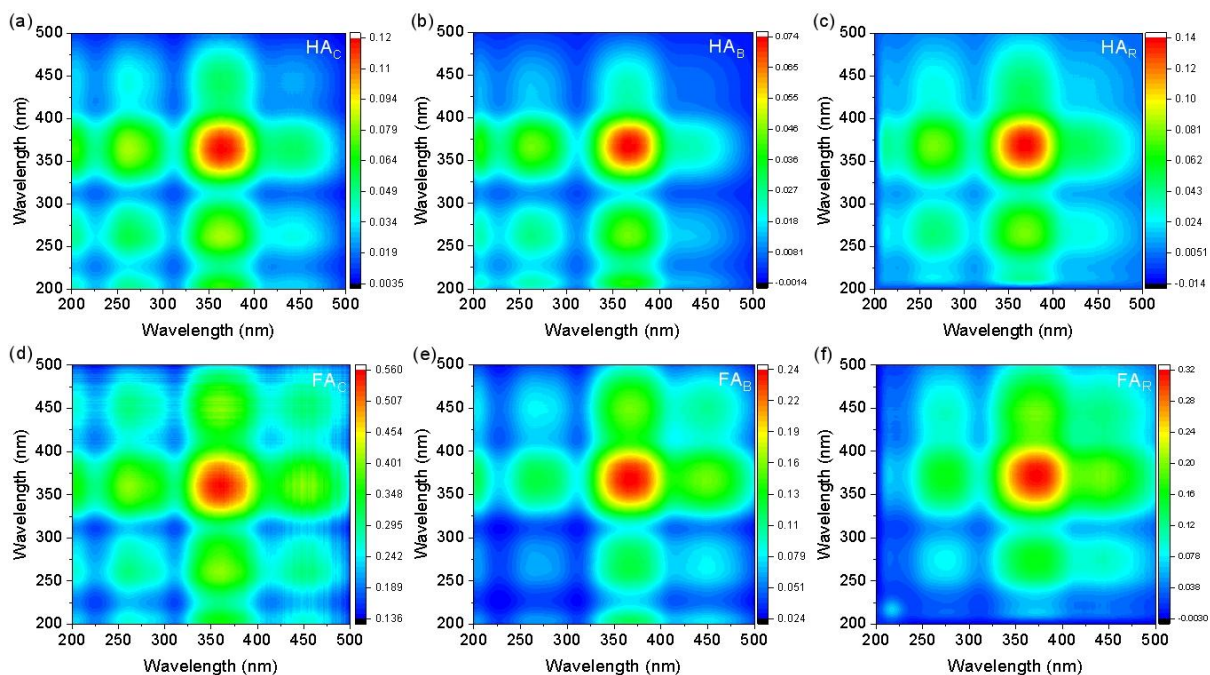

38  
 39 **Fig. S4** Synchronous maps of (a) HA<sub>C</sub>, (b) HA<sub>B</sub>, (c) HA<sub>R</sub>, (d) FA<sub>C</sub>, (e) FA<sub>B</sub>, and (f) FA<sub>R</sub> upon the addition of  
 40 Cr(VI). The  $x_1$  or  $x_2$  axis represents the wavelength of the log-transformed UV-Vis absorbance spectra.

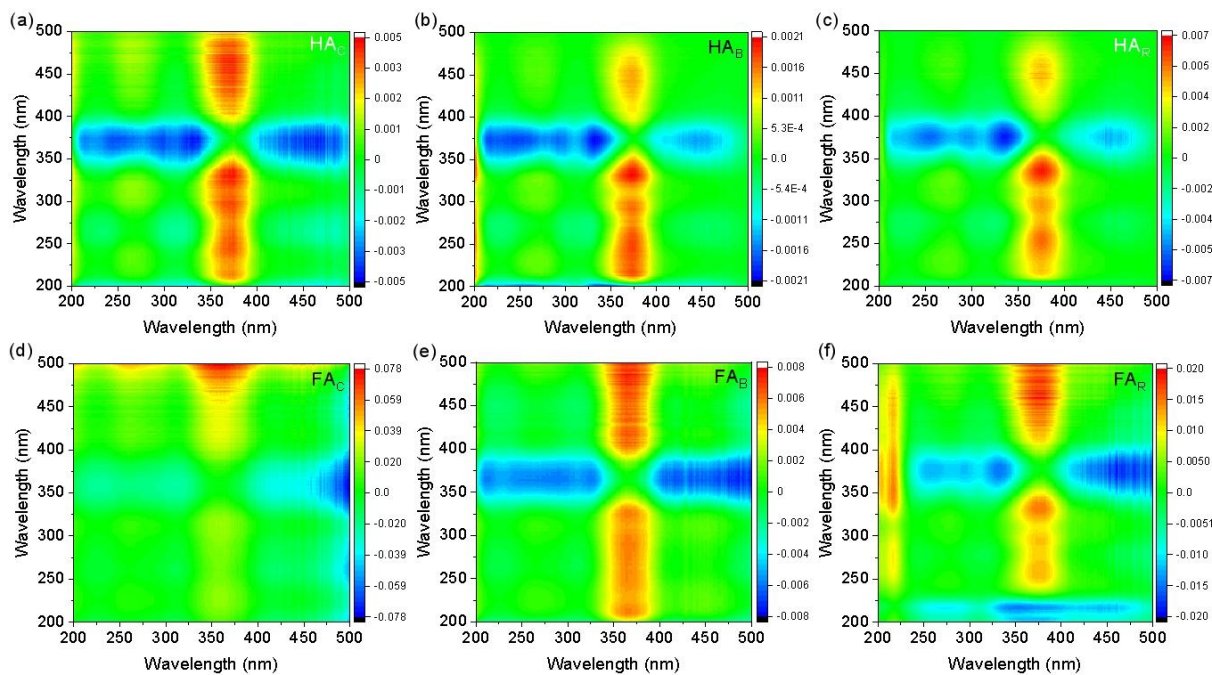

41  
 42 **Fig. S5** Asynchronous maps for (a) HA<sub>C</sub>, (b) HA<sub>B</sub>, (c) HA<sub>R</sub>, (d) FA<sub>C</sub>, (e) FA<sub>B</sub>, (f) FA<sub>R</sub> upon the addition of  
 43 Cr(VI). The  $x_1$  or  $x_2$  axis represents the wavelength of the log-transformed UV-Vis absorbance spectra.

44

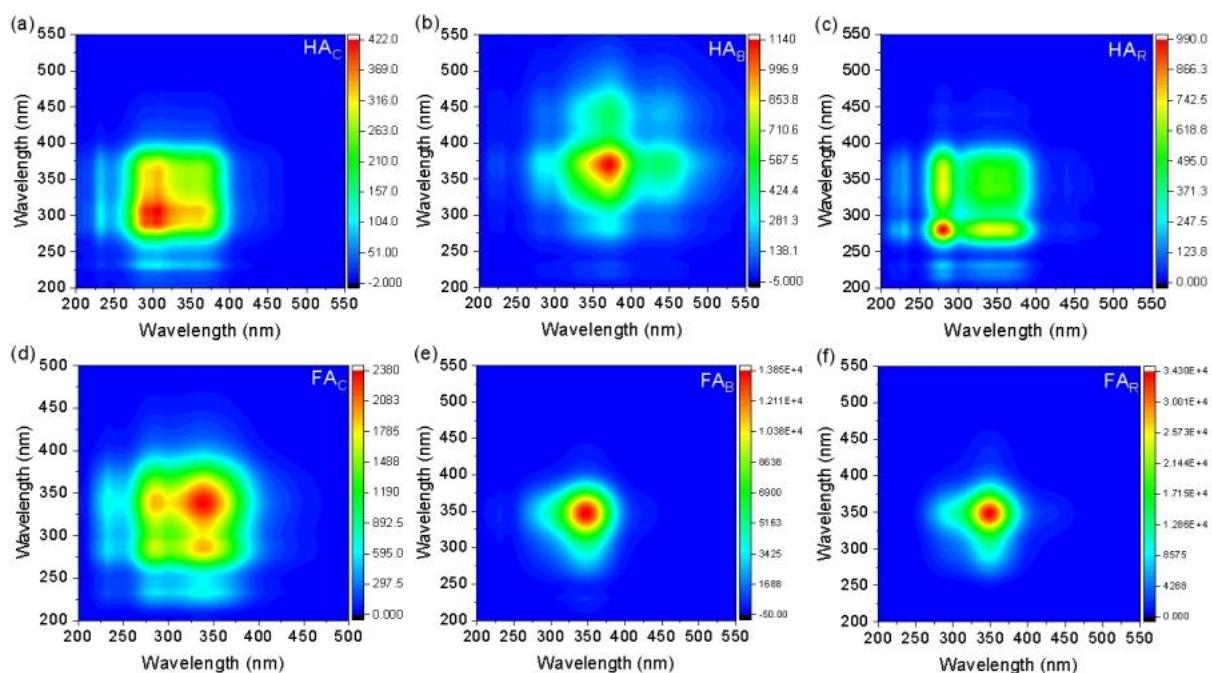

45  
 46 **Fig. S6** Synchronous 2D-SFS-COS maps of the six organic matter fractions (a, HA<sub>C</sub>; b, HA<sub>B</sub>; c, HA<sub>R</sub>; d,  
 47 FA<sub>C</sub>; e, FA<sub>B</sub>; f, FA<sub>R</sub>). The  $x_1$  or  $x_2$  was the excitation wavelength (nm) of the SFS.

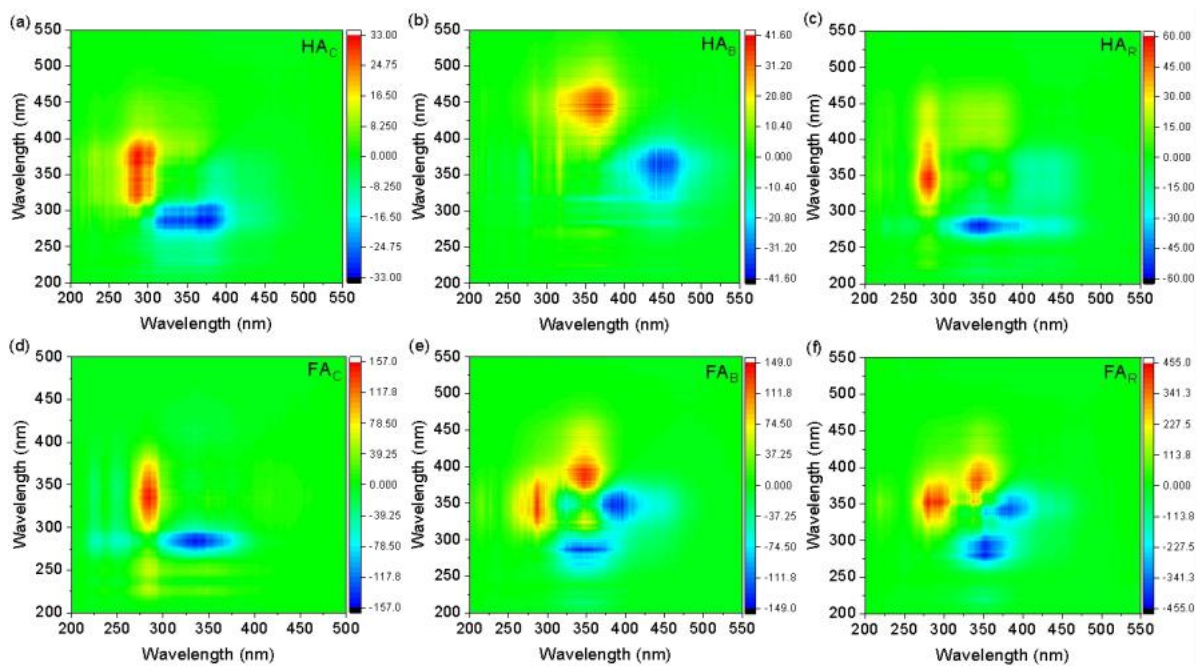

48  
 49 **Fig. S6** Asynchronous 2D-SFS-COS maps of the six organic matter fractions (a,  $HA_C$ ; b,  $HA_B$ ; c,  $HA_R$ ; d.  $FA_C$ ; e,  
 50  $FA_B$ ; f,  $FA_R$ ). The  $x_1$  or  $x_2$  was the excitation wavelength (nm) of the SFS.

51  
 52

53 **Table S1** The content of HA and FA in the six organic matter fractions

| Origin           | HA<br>(g C kg <sup>-1</sup> ) | FA<br>(g C kg <sup>-1</sup> ) | HA/FA | TOC<br>(g kg <sup>-1</sup> ) | (HA+FA)/TOC<br>(%) |
|------------------|-------------------------------|-------------------------------|-------|------------------------------|--------------------|
| Black soil       | 1.24                          | 2.11                          | 0.59  | 14.91                        | 22.47              |
| Red soil         | 0.35                          | 1.79                          | 0.20  | 6.18                         | 34.66              |
| DOM <sub>C</sub> | 7.90                          | 12.19                         | 0.64  | 185.90                       | 10.74              |

54

55 **Table S2** The relative abundance of the integration of the three synchronous fluorescence regions of the six  
56 organic matter fractions

| Fractions                       | HAC   | FAC   | HAB   | FAB   | HAR   | FAR   |
|---------------------------------|-------|-------|-------|-------|-------|-------|
| Protein-like substances (%)     | 16.33 | 16.07 | 2.81  | 6.84  | 14.65 | 8.56  |
| Fulvic acid-like substances (%) | 53.60 | 65.47 | 34.21 | 66.24 | 44.77 | 68.95 |
| Humic acid-like substances (%)  | 30.07 | 18.46 | 62.99 | 26.93 | 40.58 | 22.50 |

57

58
